# Supplementary material for: Distinct secondary ice production processes observed in radar Doppler spectra: insights from a case study
Source: Copernicus journal article supplement (doi:10.5194/acp-23-10207-2023), 2023-09-14
Supplement: Supplementary file 1 [file acp-23-10207-2023-supplement.zip]

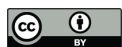

*Supplement of*

## **Distinct secondary ice production processes observed in radar Doppler spectra: insights from a case study**

**Anne-Claire Billault-Roux et al.**

*Correspondence to:* Anne-Claire Billault-Roux ([anne-claire.billault-roux@epfl.ch](mailto:anne-claire.billault-roux@epfl.ch)) and Alexis Berne ([alexis.berne@epfl.ch](mailto:alexis.berne@epfl.ch))

- [acp-23-10207-2023-supplement-title-page.pdf](#)
- [Phase1\\_spectra.mp4](#)
- [Phase2\\_spectra.mp4](#)
- [Phase3\\_spectra.mp4](#)

The copyright of individual parts of the supplement might differ from the article licence.
